# Supplementary material
Source: publisher figshare collection journal article supplement (https://frontiersin.figshare.com/ndownloader/files/24346676)
Supplement: Supplementary file [file 24346676]

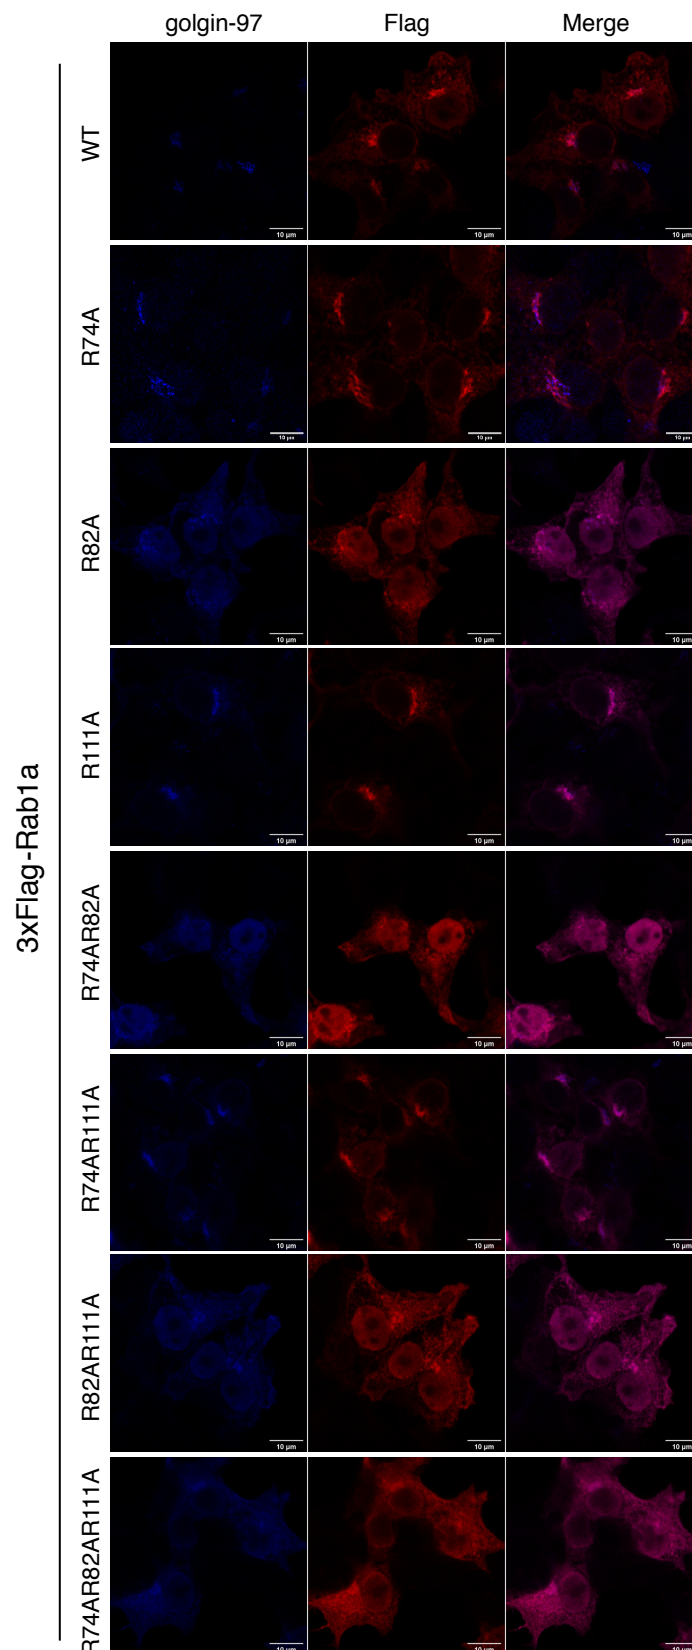

**Supplementary Figure 1. Localisation of Rab1a arginine site-directed mutants.**

The intracellular localisation pattern of wild type (WT) 3xFlag-Rab1a or arginine mutants were examined by confocal microscopy in transfected HEK293T cells. Anti-golgin-97 and anti-Flag antibodies were used to identify the Golgi and recombinant 3xFlag-Rab1a respectively. Representative immunofluorescence fields of 3 independent experiments.

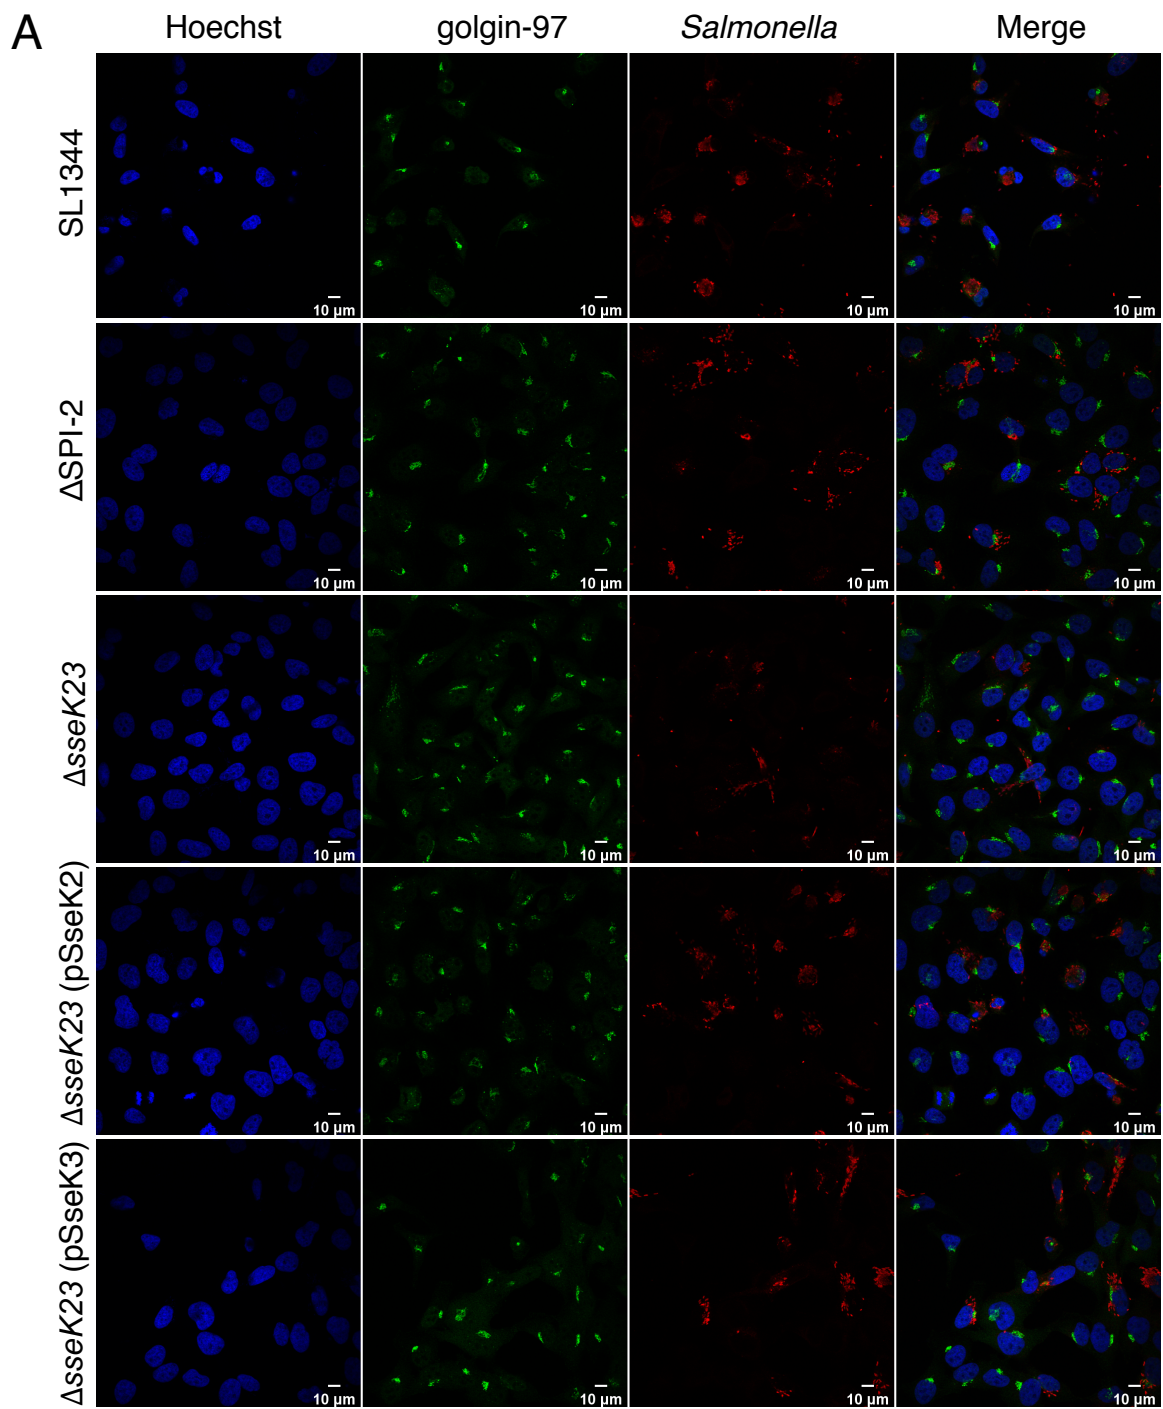

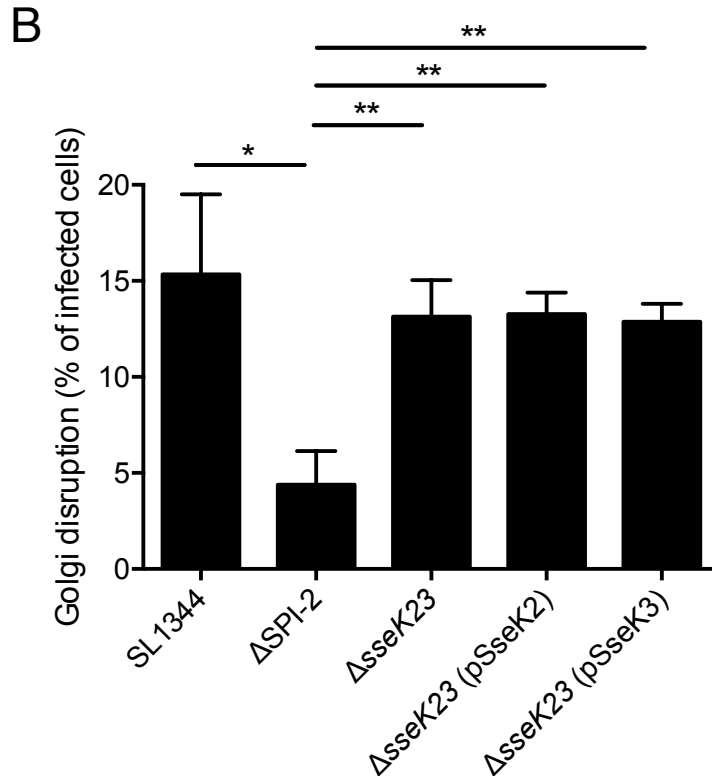

**Supplementary Figure 2. Golgi disruption in *S. Typhimurium*-infected HeLa229 cells.**

(A) Immunofluorescence microscopy showing HeLa229 cells infected with derivatives of *S. Typhimurium* SL1344 at 20 hours post infection. Cells are stained with Hoechst (blue), anti-golgin-97 or anti-*Salmonella* CSA-1. Representative immunofluorescence fields of at least 3 independent experiments.

(B) Quantification of infected cells with disrupted golgin-97 staining after 20 hours of *S. Typhimurium* SL1344 infection. Results are mean + SD of at least 100 cells counted for each of three independent experiments. \* $P < 0.05$ , \*\* $P < 0.01$ ; unpaired, two-tailed t-test.

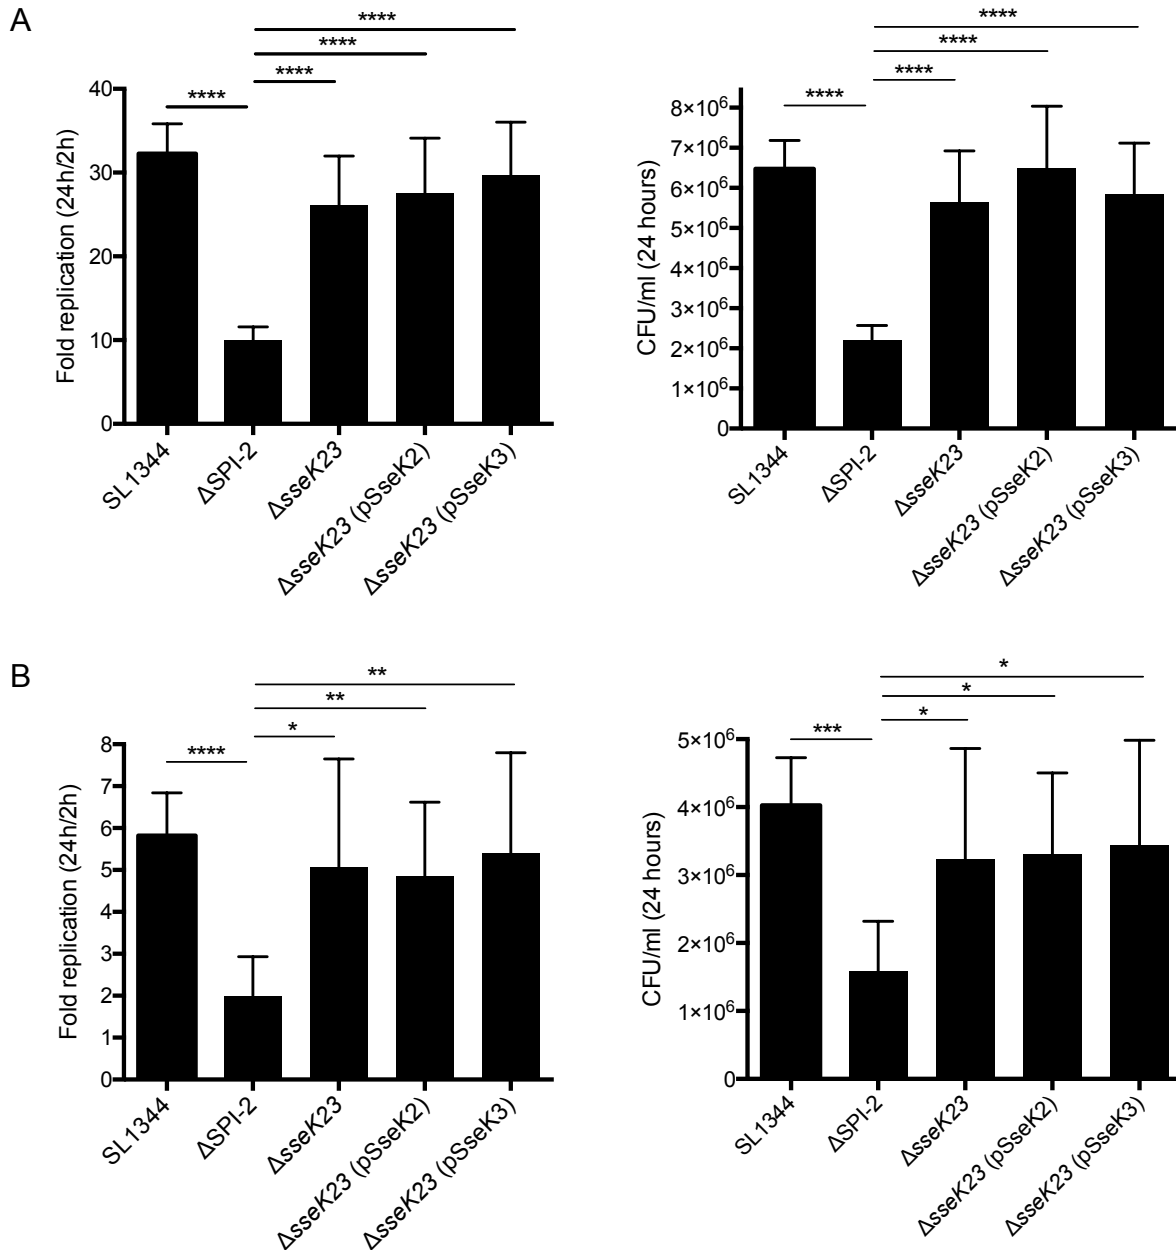

**Supplementary Figure 3. Intracellular replication of the *Salmonella* SL1344 strains used in this study.**

**(A)** Intracellular replication of *Salmonella* SL1344 derivatives in HeLa229 SEAP cells. Replication is expressed as a fold change in colony-forming units (CFU) after 24 hours compared to CFU after 2 hours of infection, or CFU/ml at 24 hours post infection. Results are mean + SD of three independent experiments performed in duplicate. \*\*\*\*P < 0.0001; unpaired, two-tailed t-test.

**(B)** Intracellular replication of *Salmonella* SL1344 derivatives in RAW 264.7 cells. Replication is expressed as a fold change in colony-forming units (CFU) after 24 hours compared to CFU after 2 hours of infection or CFU/ml at 24 hours post infection. Results are mean + SD of three independent experiments performed in duplicate. \*P < 0.05, \*\*P < 0.01, \*\*\*P < 0.001, \*\*\*\*P < 0.0001; unpaired, two-tailed t-test.
